# Supplementary material for: Carbonate-based Janus micromotors moving in ultra-light acidic environment generated by HeLa cells in situ
Source: PubMed Central journal article supplement (PMC4764847; doi:10.1038/srep21701), 2016-02-24
Supplement: srep21701-s6.pdf [file srep21701-s6.pdf]

## Supporting Information

### Carbonate-based Janus micromotors moving in ultra-light acidic environment generated by HeLa cells *in situ*

Maria Guix,\* Anne K. Meyer, Britta Koch, and Oliver G. Schmidt

#### Supplementary Figures

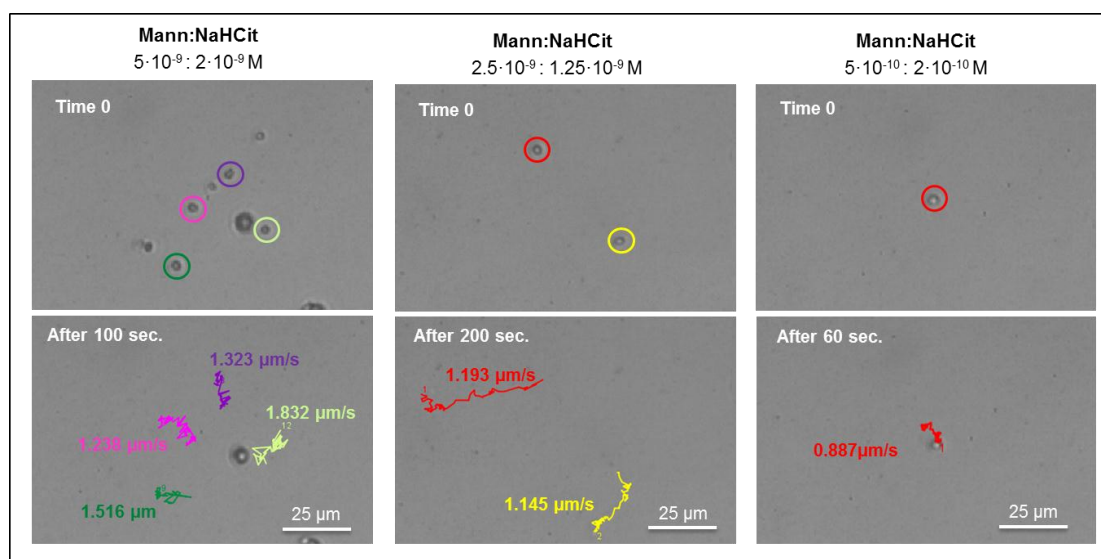

**Figure S1. CaCO<sub>3</sub> Janus particles motion in static conditions.** CaCO<sub>3</sub> Janus particles tracking under different acidic working conditions in parafilm platforms: 5:2 nM, 2.5:1.25 nM and 0.5:0.2 nM Mannitol:Sodium dihydrogen citrate concentration, at initial time and after 100 seconds, 200 seconds and 60 seconds, respectively. Scale bar, 25 μm.

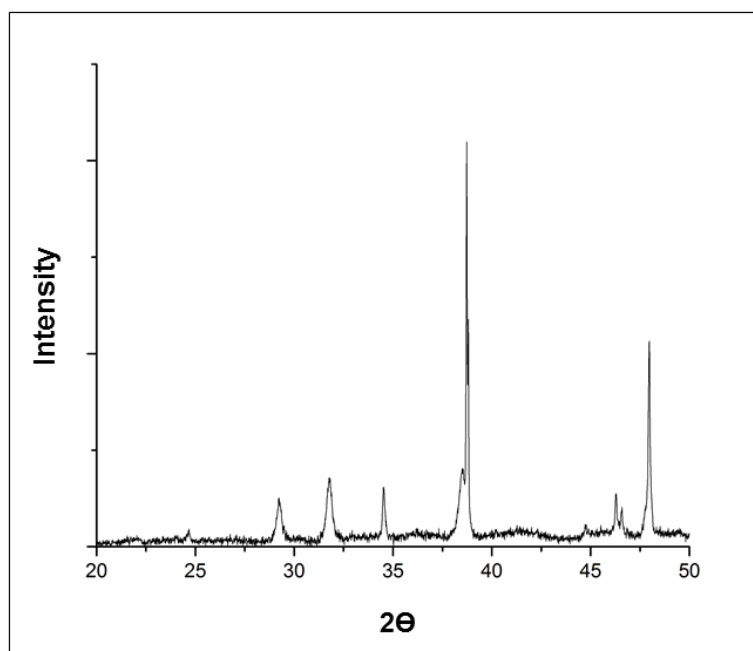

**Figure S2. XRD characterization.** XRD patterns correspond to  $\text{CaCO}_3$  microparticles onto silicon wafer where a calcite-vaterite structure was revealed. The bands related to calcite structure were observed around  $24.5 \text{ cm}^{-1}$ ,  $29 \text{ cm}^{-1}$ ,  $34.5 \text{ cm}^{-1}$ ,  $39 \text{ cm}^{-1}$  and the double band around  $46 \text{ cm}^{-1}$ . Regarding vaterite structure, the corresponding bands were located around  $32 \text{ cm}^{-1}$  and  $48 \text{ cm}^{-1}$ . It should be noted that the band, which would correspond to silicon can be found around  $39 \text{ cm}^{-1}$ .

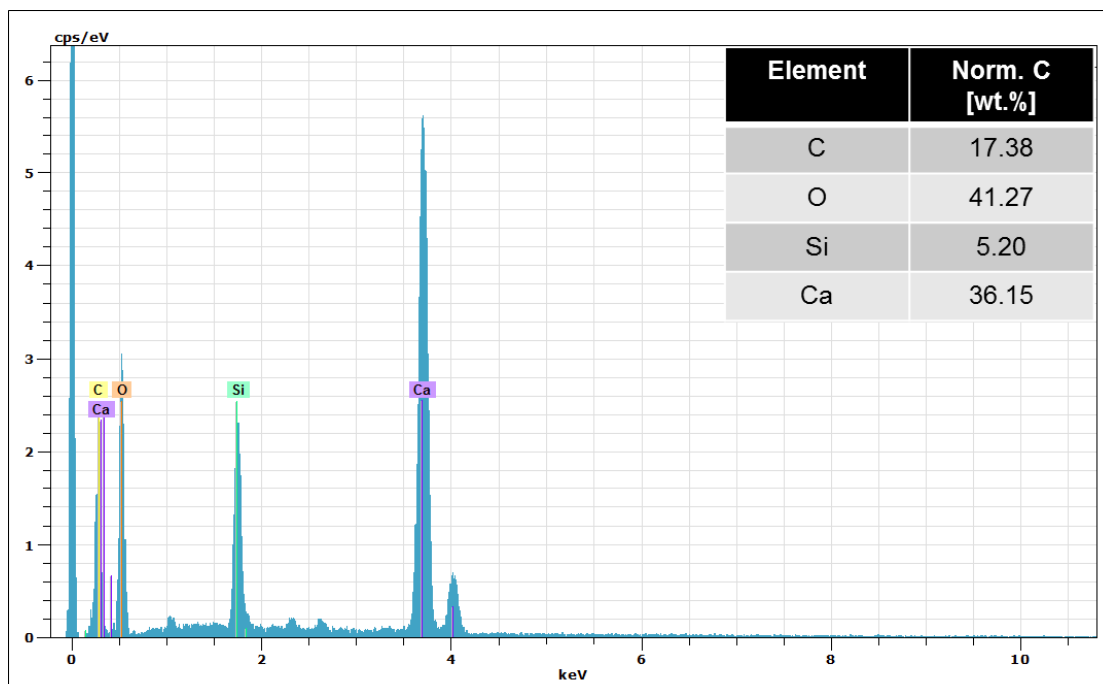

**Figure S3. CaCO<sub>3</sub> particles composition.** X-ray microanalysis of CaCO<sub>3</sub> Janus particles mounted onto a silicon wafer, using a Scanning Electron Microscope (SEM) Ultra Plus (Zeiss). Inset: Table showing the different elements present, with their corresponding weight percentage, of CaCO<sub>3</sub> Janus particles.

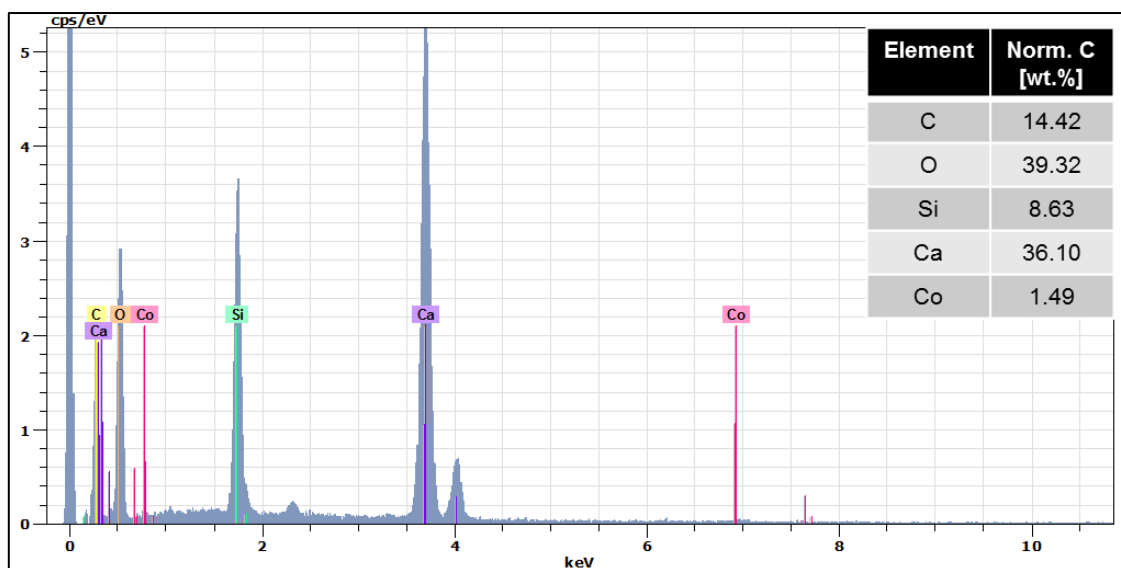

**Figure S4. CaCO<sub>3</sub> Janus particles composition.** X-ray microanalysis of CaCO<sub>3</sub> Janus particles mounted onto a silicon wafer, using a Scanning Electron Microscope (SEM) Ultra

Plus (Zeiss). Inset: Table showing the different elements present, with their corresponding weight percentage, of CaCO<sub>3</sub> particles with a 0.8nm cobalt layer.

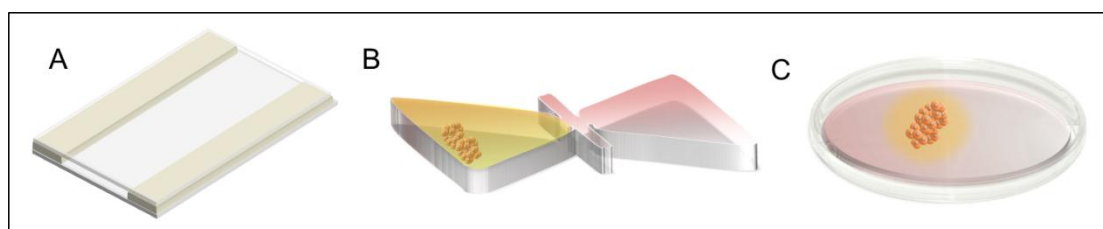

**Figure S5:** Schematic of different platforms used along all the experiments (real photo and schematic).

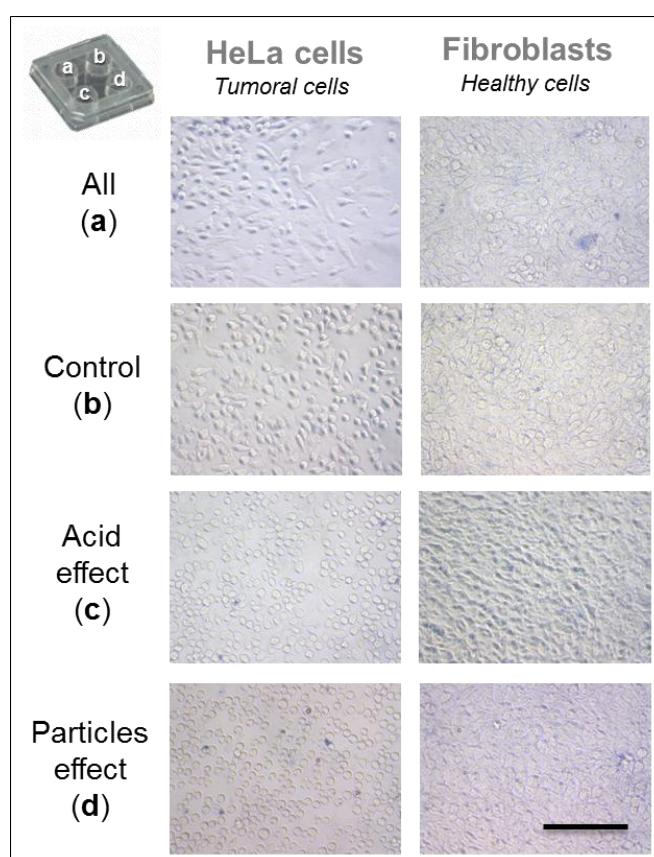

**Figure S6. Viability test to evaluate acid and particles effect.** Viability test of HeLa cells (tumor cells) and Fibroblast (healthy cells) performed by co-culturing them in the same petri dish with pH-buffered medium and incubation time of 6 hours in presence of acid mixture and CaCO<sub>3</sub> Janus particles (a); none of them (b); only with acidic mixture, 2.5:1.25 nM, Mannitol: dihydrogen citrate (c); and only with CaCO<sub>3</sub> Janus particles (d). Scale bar, 200 μm.

### ***Supplementary videos***

**Movie S1:** CaCO<sub>3</sub> Janus particles motion in paraffilm platforms at in presence in presence of 2.5:1.25 nM concentration of Mannitol:dihydrogen citrate.

**Movie S2:** CaCO<sub>3</sub> particles in presence of conditioned cell media.

**Movie S3:** CaCO<sub>3</sub> Janus particles in presence of conditioned cell media and non-buffered cell media.

**Movie S4:** CaCO<sub>3</sub> Janus particles in presence of conditioned cell media (associated statistical studies). Real time indicated in minutes.

**Movie S5:** CaCO<sub>3</sub> Janus particles motion in tumor acidic microenvironments *in situ* generated by Hela cells. Real time indicated in minutes.
